# Supplementary material
Source: publisher figshare collection journal article supplement (https://acs.figshare.com/ndownloader/files/4017214)
Supplement: Supplementary file 1 [file 4017214]

# Supporting information

## Polyelectrolyte Interlayer for Ultra-Sensitive Organic Transistor Humidity Sensors

Yeong Don Park<sup>†</sup>, Boseok Kang<sup>†</sup>, Ho Sun Lim, Kilwon Cho, Moon Sung Kang,\* and Jeong Ho Cho\*

<sup>†</sup> Prof. Y. D. Park and B. Kang contributed equally to this work.

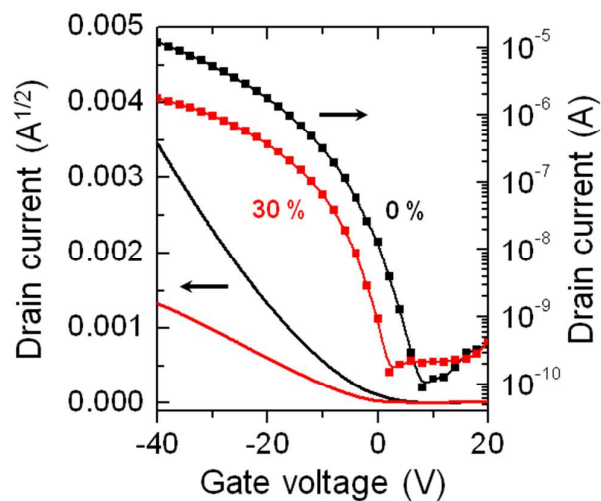

**Figure S1.** Transfer characteristics of a reference pentacene FET sensor at relative humidity levels of 0 and 30% ( $V_D = -40$  V).

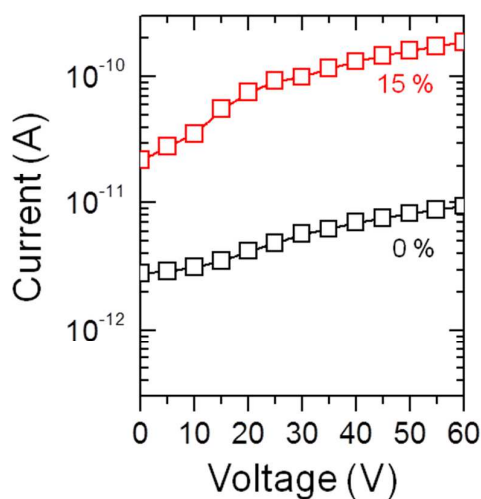

**Figure S2.**  $I$ - $V$  characteristics of poly(METAC-co-TSPM) thin film at relative humidity of 0 and 15 %.

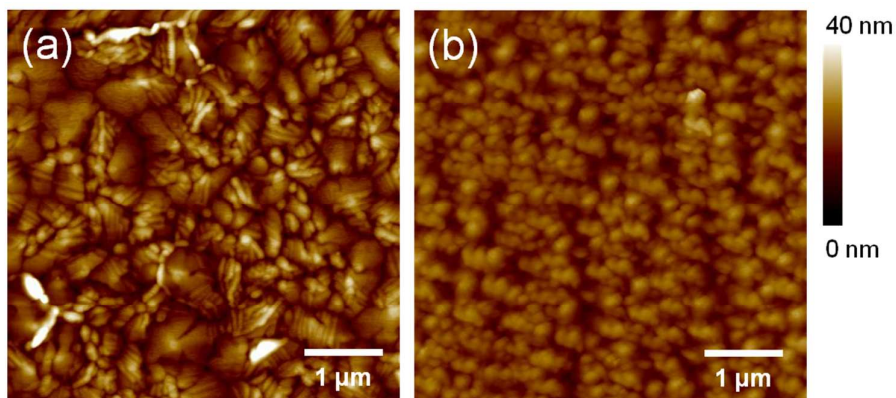

**Figure S3.** AFM images of 50-nm-thick pentacene on (a) a pristine poly(METAC-*co*-TSPM) layer and (b) a poly(METAC-*co*-TSPM) layer treated with photoresist.

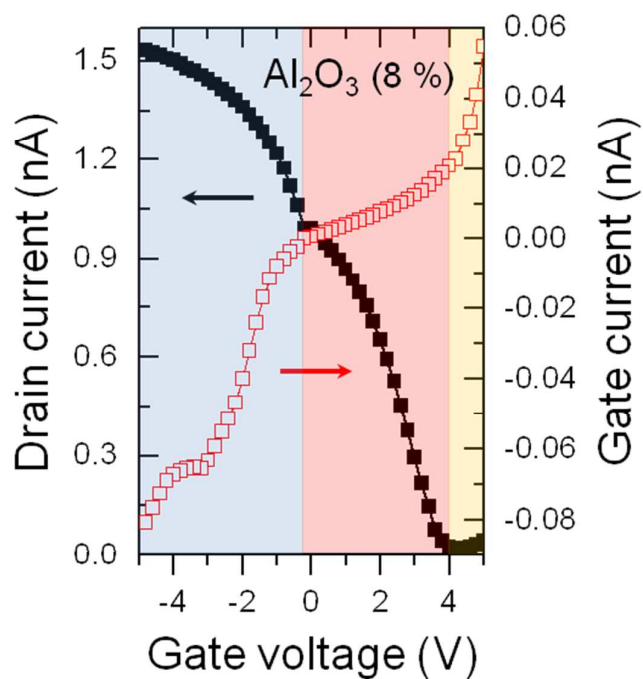

**Figure S4.** A representative transfer characteristic with  $I_G$  ( $V_D = -5$  V) of the low voltage flexible sensors on  $\text{Al}_2\text{O}_3$

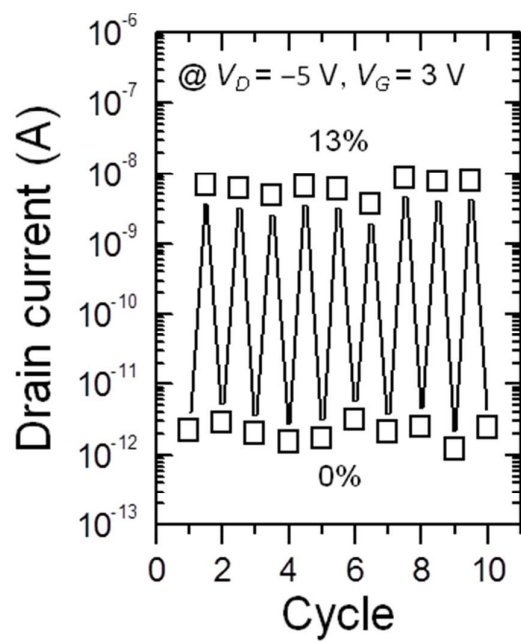

**Figure S5.** Plot of  $I_D$  for flexible sensors at  $V_G = 3$  V and  $V_D = -5$  V as a function of the switching cycle.
